# Supplementary material for: Single-cell transcriptome analysis identifies a unique tumor cell type producing multiple hormones in ectopic ACTH and CRH secreting pheochromocytoma
Source: eLife. 2021 Dec 14;10:e68436. doi: 10.7554/eLife.68436 (PMC8719890; doi:10.7554/eLife.68436)
Supplement: Supplementary file 1. [file elife-68436-supp1.xlsx]

## Sheet: scRNA-Seq_RawData_QC
Sample	Number of Reads	Valid Barcodes	Q30 Bases in Barcode	Q30 Bases in RNA Read	Q30 Bases in Sample Index	Q30 Bases in UMI
esPHEO_T1	407102724	0.985	0.968	0.867	0.942	0.972
esPHEO_T2	422904067	0.987	0.97	0.876	0.951	0.974
esPHEO_T3	413972425	0.986	0.969	0.859	0.94	0.972
esPHEO_Adj	417261603	0.986	0.968	0.852	0.947	0.973
PHEO_T	549318987	0.98	0.965	0.926	0.963	0.972
ACA_T1	508737072	0.973	0.966	0.932	0.964	0.974
ACA_T2	503355044	0.974	0.966	0.929	0.963	0.972

## Sheet: WES_RawData_QC
Sample	R1					R2
	Total Reads	Reads length	Q20	Q30	BaseCount(M)	Total Reads	Reads length	Q20	Q30	BaseCount(M)
esPHEO_T2	47839253	150	99.98%	98.00%	7146.66	47839253	150	98.88%	94.89%	7136.8
esPHEO_T3	46221621	150	99.98%	97.91%	6918.36	46221621	150	98.71%	94.96%	6908.8
esPHEO_Adj	43815268	150	99.98%	97.88%	6544.23	43815268	150	98.76%	95.44%	6535.56
esPHEO_Blood	32124105	150	99.98%	96.32%	4818.62	32124105	150	99.93%	94.56%	4818.62
