# Supplementary material for: Single-cell transcriptome analysis identifies a unique tumor cell type producing multiple hormones in ectopic ACTH and CRH secreting pheochromocytoma
Source: eLife. 2021 Dec 14;10:e68436. doi: 10.7554/eLife.68436 (PMC8719890; doi:10.7554/eLife.68436)
Supplement: Supplementary file 2. [file elife-68436-supp2.xlsx]

## Sheet: cell clusters
	esPHEO_T1	esPHEO_T2	esPHEO_T3	esPHEO_adj	PHEO_T	ACA_T1	ACA_T2
ACTH+&CRH+ pheochromocyte	73	39	414	0	0	0	0
Pheochromocyte	0	0	0	0	224	1	1
Adrenocortical	0	0	0	5	23	105	220
Sustentacular	0	0	0	1	120	0	0
Erythroblast/Granulosa	64	237	375	234	0	50	1
Endothelial	1744	736	1770	5000	496	538	853
Fibroblast	228	176	56	230	681	98	155
Neutrophil	278	465	517	296	50	482	442
Monocyte	0	0	1	0	267	2	0
Macrophage	287	59	426	627	112	883	2222
Plasma	2	10	20	30	2	74	18
B	30	36	91	31	18	724	290
NK	1	0	0	0	27	413	235
CD8+ T & NKT	969	2382	1272	1146	59	36	23
CD8+ T	1651	484	2227	2174	579	39	27
CD4+ T	4	2	3	23	96	3210	3689

## Sheet: top 10 gene markers
cluster	avg_logFC	pct.1	pct.2	p_val	p_val_adj	marker_gene
ACTH+&CRH+ pheochromocyte	363.426	0.673	0.04	0	0	GAL
ACTH+&CRH+ pheochromocyte	140.426	0.894	0.053	0	0	PNMT
ACTH+&CRH+ pheochromocyte	94.0057	0.734	0.037	0	0	POMC
ACTH+&CRH+ pheochromocyte	93.5532	0.911	0.042	0	0	CARTPT
ACTH+&CRH+ pheochromocyte	41.3989	0.572	0.012	0	0	DIRAS3
ACTH+&CRH+ pheochromocyte	38.3886	0.485	0.007	0	0	CRH
ACTH+&CRH+ pheochromocyte	30.6885	0.422	0.012	0	0	TCAP
ACTH+&CRH+ pheochromocyte	7.16811	0.403	0.034	0	0	PEMT
ACTH+&CRH+ pheochromocyte	57.4263	0.549	0.112	8.5817e-234	2.87813e-229	ATP1B1
ACTH+&CRH+ pheochromocyte	26.4192	0.719	0.436	1.50269e-66	5.03971e-62	GNAS
Pheochromocyte	Inf	0.836	0.052	0	0	NPY
Pheochromocyte	Inf	0.982	0.06	0	0	CHGA
Pheochromocyte	Inf	0.942	0.086	0	0	DLK1
Pheochromocyte	Inf	0.978	0.081	0	0	CHGB
Pheochromocyte	512.405	0.912	0.03	0	0	PENK
Pheochromocyte	181.277	0.929	0.037	0	0	PCSK1N
Pheochromocyte	155.278	0.978	0.073	0	0	RGS5
Pheochromocyte	125.741	0.832	0.022	0	0	UCHL1
Pheochromocyte	82.2919	0.655	0.013	0	0	DBH
Pheochromocyte	73.276	0.553	0.004	0	0	NNAT
Adrenocortical	192.491	0.858	0.082	0	0	CYP17A1
Adrenocortical	153.829	0.958	0.25	0	0	AKR1B1
Adrenocortical	113.836	0.728	0.068	0	0	RARRES2
Adrenocortical	95.4913	0.603	0.047	0	0	PCP4
Adrenocortical	82.0628	0.632	0.019	0	0	CYP21A2
Adrenocortical	74.8315	0.725	0.038	0	0	HSD3B2
Adrenocortical	65.1786	0.938	0.061	0	0	STAR
Adrenocortical	53.8177	0.926	0.212	0	0	FDX1
Adrenocortical	50.1151	0.598	0.03	0	0	FATE1
Adrenocortical	43.3831	0.861	0.069	0	0	MGST1
Sustentacular	92.1791	0.512	0	0	0	TTR
Sustentacular	81.9532	0.942	0.031	0	0	S100B
Sustentacular	33.1924	0.413	0.001	0	0	S100A1
Sustentacular	28.1924	0.909	0.002	0	0	PLP1
Sustentacular	26.4274	0.959	0.049	0	0	GPM6B
Sustentacular	18.8499	0.983	0.068	0	0	TMEM176B
Sustentacular	18.1918	0.62	0.005	0	0	MPZ
Sustentacular	17.6986	0.661	0.03	0	0	TIMP4
Sustentacular	17.2028	0.81	0	0	0	NRXN1
Sustentacular	16.5605	0.884	0.046	0	0	TMEM176A
Erythroblast/Granulosa	487.12	0.639	0.005	0	0	CA1
Erythroblast/Granulosa	354.712	0.624	0.008	0	0	HBD
Erythroblast/Granulosa	305.718	0.627	0.004	0	0	AHSP
Erythroblast/Granulosa	215.127	0.441	0.002	0	0	HBM
Erythroblast/Granulosa	97.6629	0.826	0.132	0	0	SLC25A37
Erythroblast/Granulosa	75.9701	0.609	0.164	0	0	BLVRB
Erythroblast/Granulosa	66.5361	0.752	0.006	0	0	ALAS2
Erythroblast/Granulosa	32.4724	0.444	0.002	0	0	SLC4A1
Erythroblast/Granulosa	26.0018	0.661	0.032	0	0	SNCA
Erythroblast/Granulosa	15.6394	0.723	0.134	0	0	SLC25A39
Endothelial	53.045	0.526	0.049	0	0	PLAT
Endothelial	52.0817	0.593	0.043	0	0	FCN3
Endothelial	47.5079	0.753	0.389	0	0	FKBP1A
Endothelial	47.0975	0.566	0.03	0	0	CAVIN2
Endothelial	47.0975	0.457	0.028	0	0	DNASE1L3
Endothelial	42.9987	0.444	0.244	0	0	CTNNB1
Endothelial	40.0975	0.609	0.411	0	0	RGCC
Endothelial	38.7201	0.414	0.017	0	0	CLDN5
Endothelial	34.1335	0.926	0.112	0	0	SPARCL1
Endothelial	33.0975	0.597	0.06	0	0	VWF
Fibroblast	Inf	0.814	0.352	0	0	GSN
Fibroblast	Inf	0.978	0.207	0	0	MGP
Fibroblast	Inf	0.67	0.024	0	0	DCN
Fibroblast	508.274	0.677	0.063	0	0	IGFBP6
Fibroblast	490.629	0.98	0.361	0	0	IGFBP7
Fibroblast	449.274	0.898	0.294	0	0	TIMP1
Fibroblast	380.27	0.674	0.032	0	0	ACTA2
Fibroblast	367.273	0.784	0.009	0	0	COL1A2
Fibroblast	336.274	0.881	0.042	0	0	TAGLN
Fibroblast	302.256	0.612	0.01	0	0	COL1A1
Neutrophil	225.809	0.821	0.23	0	0	S100A9
Neutrophil	209.809	0.771	0.236	0	0	S100A8
Neutrophil	112.809	0.983	0.976	0	0	TMSB10
Neutrophil	81.8089	0.46	0.023	0	0	AC020656.1
Neutrophil	81.4326	0.458	0.033	0	0	S100A12
Neutrophil	22.7783	0.631	0.289	0	0	SAMSN1
Neutrophil	20.809	0.549	0.026	0	0	EREG
Neutrophil	16.2018	0.896	0.13	0	0	LST1
Neutrophil	15.4848	0.617	0.089	0	0	BCL2A1
Neutrophil	13.8218	0.826	0.486	0	0	SERP1
Monocyte	95.1037	1	0.138	0	0	HLA-DQA1
Monocyte	74.099	1	0.216	0	0	HLA-DQB1
Monocyte	50.3807	0.996	0.146	0	0	HLA-DMB
Monocyte	48.2259	0.904	0.138	0	0	C1QC
Monocyte	41.1475	0.948	0.147	0	0	CD68
Monocyte	38.0898	0.474	0.027	0	0	PLA2G7
Monocyte	32.9291	0.911	0.082	0	0	CPVL
Monocyte	32.3465	0.83	0.078	0	0	TREM2
Monocyte	24.7312	0.663	0.054	0	0	FOLR2
Monocyte	23.1919	0.859	0.08	0	0	IGSF6
Macrophage	Inf	0.998	0.954	0	0	FTH1
Macrophage	394.157	0.854	0.122	0	0	APOC1
Macrophage	122.157	0.523	0.161	0	0	CCL3L1
Macrophage	98.1567	0.766	0.417	0	0	CSTB
Macrophage	68.1567	0.752	0.246	0	0	CCL3
Macrophage	45.1633	0.556	0.327	0	0	CCL4L2
Macrophage	27.8281	0.764	0.039	0	0	VSIG4
Macrophage	22.4621	0.502	0.012	0	0	GLDN
Macrophage	19.4158	0.738	0.497	0	0	DBI
Macrophage	19.2288	0.837	0.285	0	0	HLA-DRB5
Plasma	Inf	0.673	0.007	0	0	IGHG2
Plasma	25.6502	0.756	0.016	0	0	MZB1
Plasma	8.64589	0.551	0.008	0	0	DERL3
Plasma	49.5477	0.519	0.027	1.86913e-302	6.26868e-298	CD79A
Plasma	14.7345	0.551	0.071	1.74982e-128	5.86855e-124	PIM2
Plasma	19.5943	0.551	0.079	1.40821e-113	4.72286e-109	CD27
Plasma	9.60313	0.577	0.1	2.77584e-98	9.30962e-94	PRDX4
Plasma	4.60804	0.417	0.054	3.22215e-93	1.08064e-88	CD38
Plasma	19.65	0.679	0.162	1.85994e-87	6.23788e-83	FKBP11
Plasma	29.6499	0.679	0.17	3.33601e-84	1.11883e-79	SEC11C
B	4.85075	0.743	0.008	0	0	MS4A1
B	3.41651	0.64	0.005	0	0	BANK1
B	2.44302	0.543	0.006	0	0	TNFRSF13C
B	0.7269	0.674	0.253	2.84001e-284	9.52482e-280	SMAP2
B	1.1556	0.415	0.119	1.8307e-221	6.13981e-217	PRDM2
B	0.713936	0.678	0.362	4.29229e-153	1.43955e-148	KMT2E
B	0.974894	0.422	0.158	2.0376e-142	6.83369e-138	RCSD1
B	2.45646	0.57	0.278	1.44357e-134	4.84144e-130	SMCHD1
B	1.9888	0.528	0.312	6.78976e-64	2.27715e-59	SF1
B	0.413501	0.416	0.227	4.35104e-57	1.45925e-52	AC016831.5
NK	2.95751	0.738	0.093	0	0	KLRF1
NK	2.6374	0.726	0.181	0	0	AKNA
NK	2.47417	0.933	0.184	0	0	PRF1
NK	1.22693	0.466	0.034	0	0	S1PR5
NK	1.09157	0.936	0.254	0	0	GZMH
NK	0.403215	0.877	0.222	0	0	CTSW
NK	2.33416	0.791	0.239	3.27385e-301	1.09798e-296	SYTL3
NK	3.17535	0.669	0.164	2.78552e-298	9.34207e-294	CD247
NK	2.19592	0.658	0.199	4.24585e-218	1.42397e-213	GNG2
NK	2.05093	0.676	0.211	6.38185e-216	2.14034e-211	ADGRE5
CD8+ T & NKT	248.881	0.96	0.121	0	0	GNLY
CD8+ T & NKT	94.8811	0.895	0.161	0	0	GZMB
CD8+ T & NKT	9.6478	0.497	0.234	0	0	C1orf56
CD8+ T & NKT	8.86448	0.609	0.276	0	0	CMC1
CD8+ T & NKT	4.76214	0.752	0.19	0	0	GZMH
CD8+ T & NKT	4.33499	0.41	0.034	0	0	TRDC
CD8+ T & NKT	3.64963	0.691	0.162	0	0	CTSW
CD8+ T & NKT	2.18421	0.571	0.319	0	0	CD3D
CD8+ T & NKT	2.12363	0.688	0.121	0	0	PRF1
CD8+ T & NKT	1.94868	0.418	0.199	0	0	CD3G
CD8+ T	32.4781	0.656	0.291	0	0	CD69
CD8+ T	13.6427	0.405	0.202	0	0	KLRB1
CD8+ T	9.62607	0.627	0.241	0	0	TRBC2
CD8+ T	7.95053	0.606	0.19	0	0	TRAC
CD8+ T	7.61859	0.666	0.402	0	0	CORO1A
CD8+ T	3.37252	0.645	0.227	0	0	CD2
CD8+ T	2.51462	0.732	0.423	0	0	CRIP1
CD8+ T	2.42101	0.477	0.154	0	0	GZMK
CD8+ T	2.20095	0.596	0.241	0	0	CD3E
CD8+ T	1.80677	0.701	0.292	0	0	GZMA
CD4+ T	5.88537	0.716	0.121	0	0	IL7R
CD4+ T	3.78452	0.677	0.274	0	0	FAM177A1
CD4+ T	2.85647	0.717	0.267	0	0	LEPROTL1
CD4+ T	1.86314	0.623	0.22	0	0	FYN
CD4+ T	1.61196	0.718	0.389	0	0	ELF1
CD4+ T	1.565	0.681	0.328	0	0	STK4
CD4+ T	1.39211	0.448	0.073	0	0	LINC00513
CD4+ T	1.33286	0.557	0.204	0	0	RUNX3
CD4+ T	1.28991	0.456	0.151	0	0	EML4
CD4+ T	1.20659	0.7	0.287	0	0	CD3D
