# Supplementary material for: Single-cell transcriptome analysis identifies a unique tumor cell type producing multiple hormones in ectopic ACTH and CRH secreting pheochromocytoma
Source: eLife. 2021 Dec 14;10:e68436. doi: 10.7554/eLife.68436 (PMC8719890; doi:10.7554/eLife.68436)
Supplement: Supplementary file 3. [file elife-68436-supp3.xlsx]

## Sheet: Endothelial cell clusters
Endothelial cell subtypes	PHEO_T	esPHEO_T1	esPHEO_T2	esPHEO_adj	esPHEO_T3	ACA_T1	ACA_T2
Lymphatic endothelial	22	22	22	4591	40	5	174
Vascular endothelial	456	1711	707	72	1725	4	24
Cortical endothelial	18	9	5	7	1	529	653
Other endothelial	0	2	2	330	4	0	2

## Sheet: top 10 gene markers
cluster	p_val	avg_logFC	pct.1	pct.2	p_val_adj	gene
Vascular endothelial	0	175.316	0.814	0.182	0	MGP
Vascular endothelial	0	132.866	0.445	0.799	0	HSPA1A
Vascular endothelial	0	91.5248	0.855	0.657	0	PLVAP
Vascular endothelial	0	68.3149	0.775	0.488	0	RGCC
Vascular endothelial	0	58.3149	0.475	0.058	0	IGFBP3
Vascular endothelial	0	41.3104	0.904	0.372	0	VWF
Vascular endothelial	0	20.6364	0.76	0.333	0	VWA1
Vascular endothelial	0	11.6663	0.414	0.086	0	MCAM
Vascular endothelial	2.64662e-304	36.059	0.89	0.805	8.87623e-300	HSPG2
Vascular endothelial	3.06497e-251	41.6199	0.758	0.519	1.02793e-246	PECAM1
Lymphatic endothelial	0	19.4657	0.639	0.111	0	CRHBP
Lymphatic endothelial	0	5.26976	0.599	0.256	0	INMT
Lymphatic endothelial	4.37162e-127	0.691096	0.701	0.511	1.46616e-122	GAS6
Lymphatic endothelial	2.38924e-122	0.599762	0.426	0.222	8.01305e-118	CEACAM1
Lymphatic endothelial	6.50796e-119	9.58204	0.411	0.208	2.18264e-114	C11orf96
Lymphatic endothelial	2.91744e-99	13.2013	0.413	0.576	9.7845e-95	CST3
Lymphatic endothelial	1.59835e-32	59.2499	0.91	0.934	5.36056e-28	FTH1
Lymphatic endothelial	2.31271e-27	0.881923	0.691	0.613	7.75635e-23	EMCN
Lymphatic endothelial	7.31786e-24	0.772724	0.522	0.431	2.45426e-19	KDR
Lymphatic endothelial	2.21666e-08	73.25	0.891	0.896	0.000743423	FTL
Cortical endothelial	0	407.094	0.692	0.055	0	FABP4
Cortical endothelial	0	170.112	0.942	0.827	0	NEAT1
Cortical endothelial	0	48.4734	0.772	0.329	0	TFF3
Cortical endothelial	0	44.0936	0.669	0.163	0	AKAP12
Cortical endothelial	0	29.0936	0.926	0.522	0	HSP90AB1
Cortical endothelial	0	28.9853	0.636	0.141	0	PLIN2
Cortical endothelial	0	24.0205	0.962	0.726	0	RPS20
Cortical endothelial	0	20.8287	0.511	0.066	0	ADAMTS4
Cortical endothelial	0	20.7443	0.989	0.922	0	TPT1
Cortical endothelial	0	20.1322	0.952	0.728	0	RPL23
Other endothelial	0	1.72207	0.671	0.063	0	CST7
Other endothelial	2.16761e-274	1.2169	0.541	0.053	7.26972e-270	PTPRC
Other endothelial	1.56113e-252	4.59625	0.482	0.046	5.23571e-248	TRBC1
Other endothelial	2.71299e-239	1.043	0.45	0.041	9.09881e-235	CD3E
Other endothelial	3.11057e-238	0.785111	0.568	0.069	1.04322e-233	CORO1A
Other endothelial	1.95928e-216	0.870852	0.424	0.04	6.57104e-212	CD48
Other endothelial	2.51491e-202	0.50095	0.444	0.049	8.43451e-198	GZMH
Other endothelial	1.25347e-183	0.321568	0.403	0.042	4.20388e-179	CD2
Other endothelial	1.57531e-167	57.4504	0.741	0.191	5.28328e-163	CCL4
Other endothelial	6.95902e-110	0.880756	0.435	0.083	2.33392e-105	STK4
